# Supplementary material
Source: Elsevier journal article supplement (https://www.sciencedirect.com/science/article/pii/S2387020622000705)
Supplement: mmc1 [file S2387020622000705:mmc1.docx]

# **Figura S1.** Flujograma de pacientes. No hubo ninguna pérdida de seguimiento. COVID-19: enfermedad por coronavirus 2019; ETEP: enfermedad tromboembólica pulmonar; TCAP: tomografía computarizada de arterias pulmonares.

1.025 pacientes con diagnóstico o elevada sospecha de COVID-19 (15 de marzo - 25 de abril de 2020)

**Presencia de hallazgos diagnósticos de ETEP n = 70**

**Ausencia de hallazgos diagnósticos de ETEP n = 204**

**274 pacientes con realización de TCAP por sospecha de ETEP**
